# Supplementary material for: Immunomodulation and Reduction of Thromboembolic Risk in Hospitalized COVID-19 Patients: Systematic Review and Meta-Analysis of Randomized Trials
Source: MDPI journal article supplement (doi:10.3390/jcm10225366), 2021-11-18
Supplement: s1 [file s1]

## Supplemental material

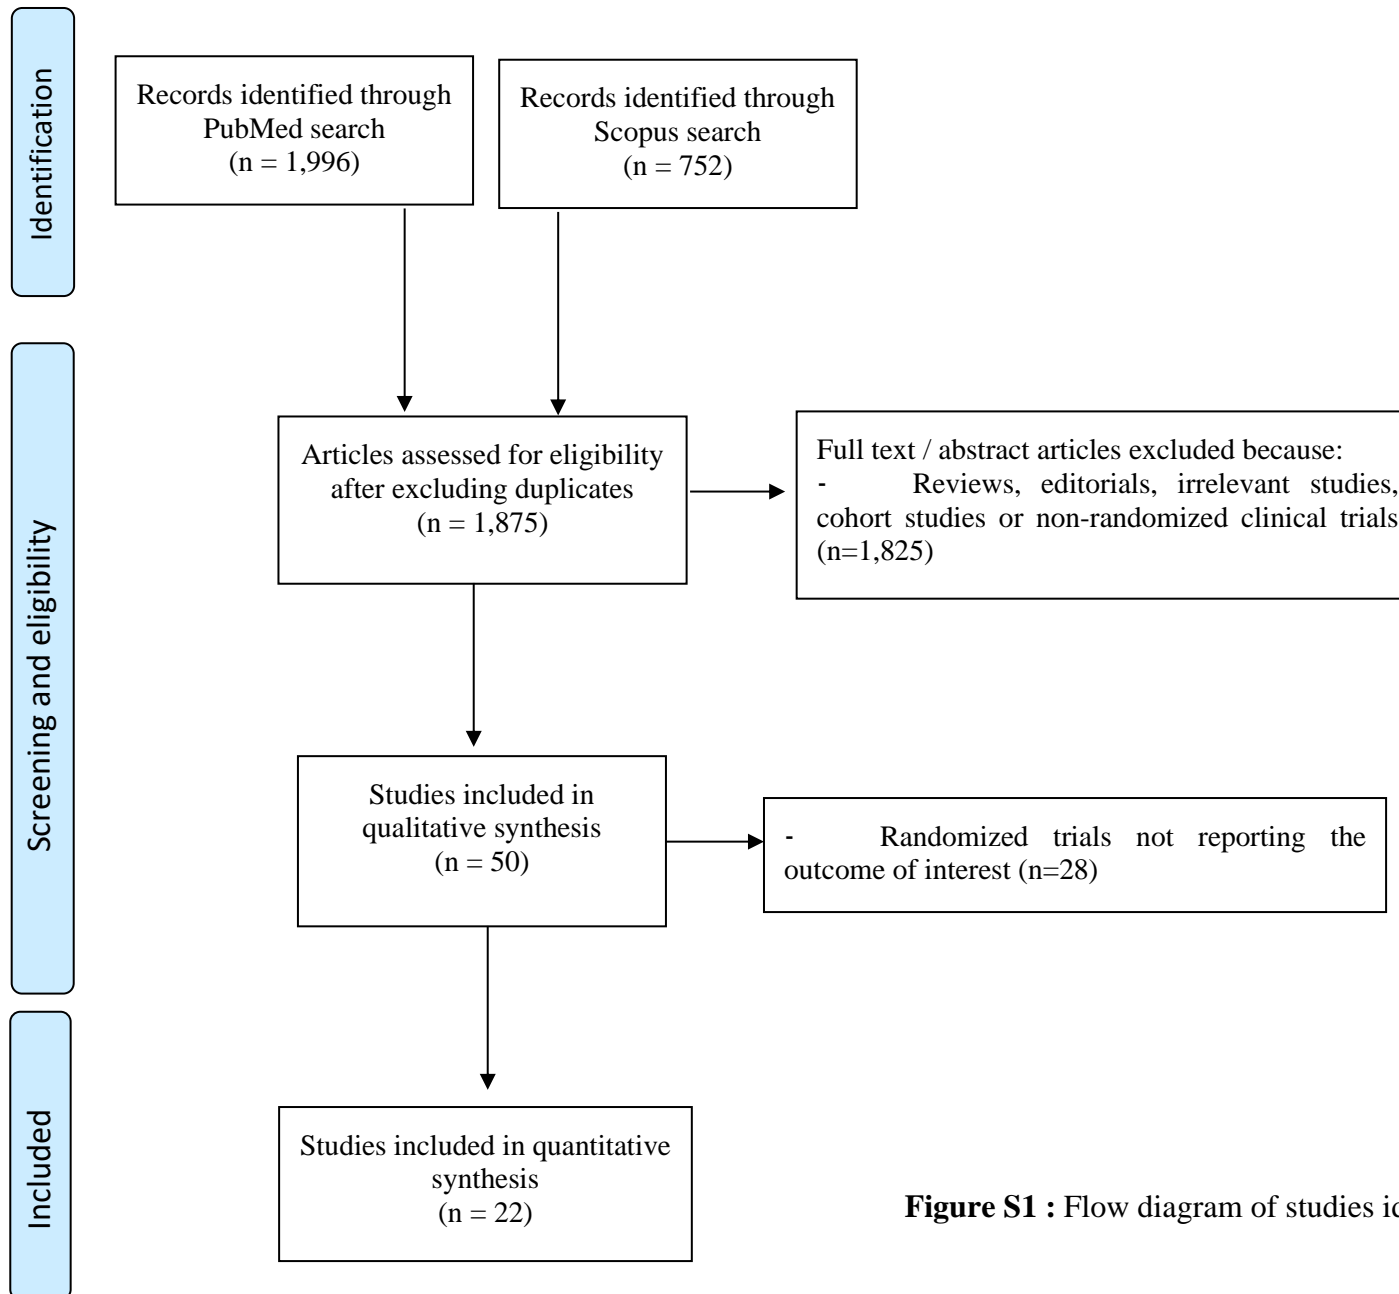

**Figure S1** : Flow diagram of studies identified, screened and included in the meta-analysis

**Table S1.** Studies of immunomodulatory agents for COVID-19

| <b>Drug</b>                               | <b>Drug class</b>                             | <b>Number of clinical trials (completed or ongoing)</b> | <b>Available studies</b>        |
|-------------------------------------------|-----------------------------------------------|---------------------------------------------------------|---------------------------------|
| <b>tocilizumab</b>                        | anti-IL6                                      | 72                                                      | <a href="#">Clinical trials</a> |
| <b>adalimumab</b>                         | anti-TNFa                                     | 1                                                       | <a href="#">Clinical trial</a>  |
| <b>infliximab</b>                         | anti-TNFa                                     | 5                                                       | <a href="#">Clinical trials</a> |
| <b>baricitinib</b>                        | Jak inhibitor                                 | 18                                                      | <a href="#">Clinical trials</a> |
| <b>ruxolitinib</b>                        | Jak inhibitor                                 | 16                                                      | <a href="#">Clinical trials</a> |
| <b>interferon</b>                         | Signaling protein -<br>Immunomodulatory agent | 141                                                     | <a href="#">Clinical trials</a> |
| <b>IVIG</b>                               | Immunomodulatory agent                        | 23                                                      | <a href="#">Clinical trials</a> |
| <b>colchicine</b>                         | Anti-inflammatory                             |                                                         | <a href="#">Clinical trials</a> |
| <b>GM-CSF (e.g. sargramostin)</b>         | GM-CSF                                        | 41                                                      | <a href="#">Clinical trials</a> |
| <b>anakinra</b>                           | anti-IL1                                      | 31                                                      | <a href="#">Clinical trials</a> |
| <b>hyperimmune or convalescent plasma</b> | -                                             | 460                                                     | <a href="#">Clinical trials</a> |

GM-CSF: Granulocyte-macrophage colony-stimulating factor, IL: interleukin, IVIG: intravenous immunoglobulin, Jak: Janus kinase, TNF: tumor necrosis factor

B.

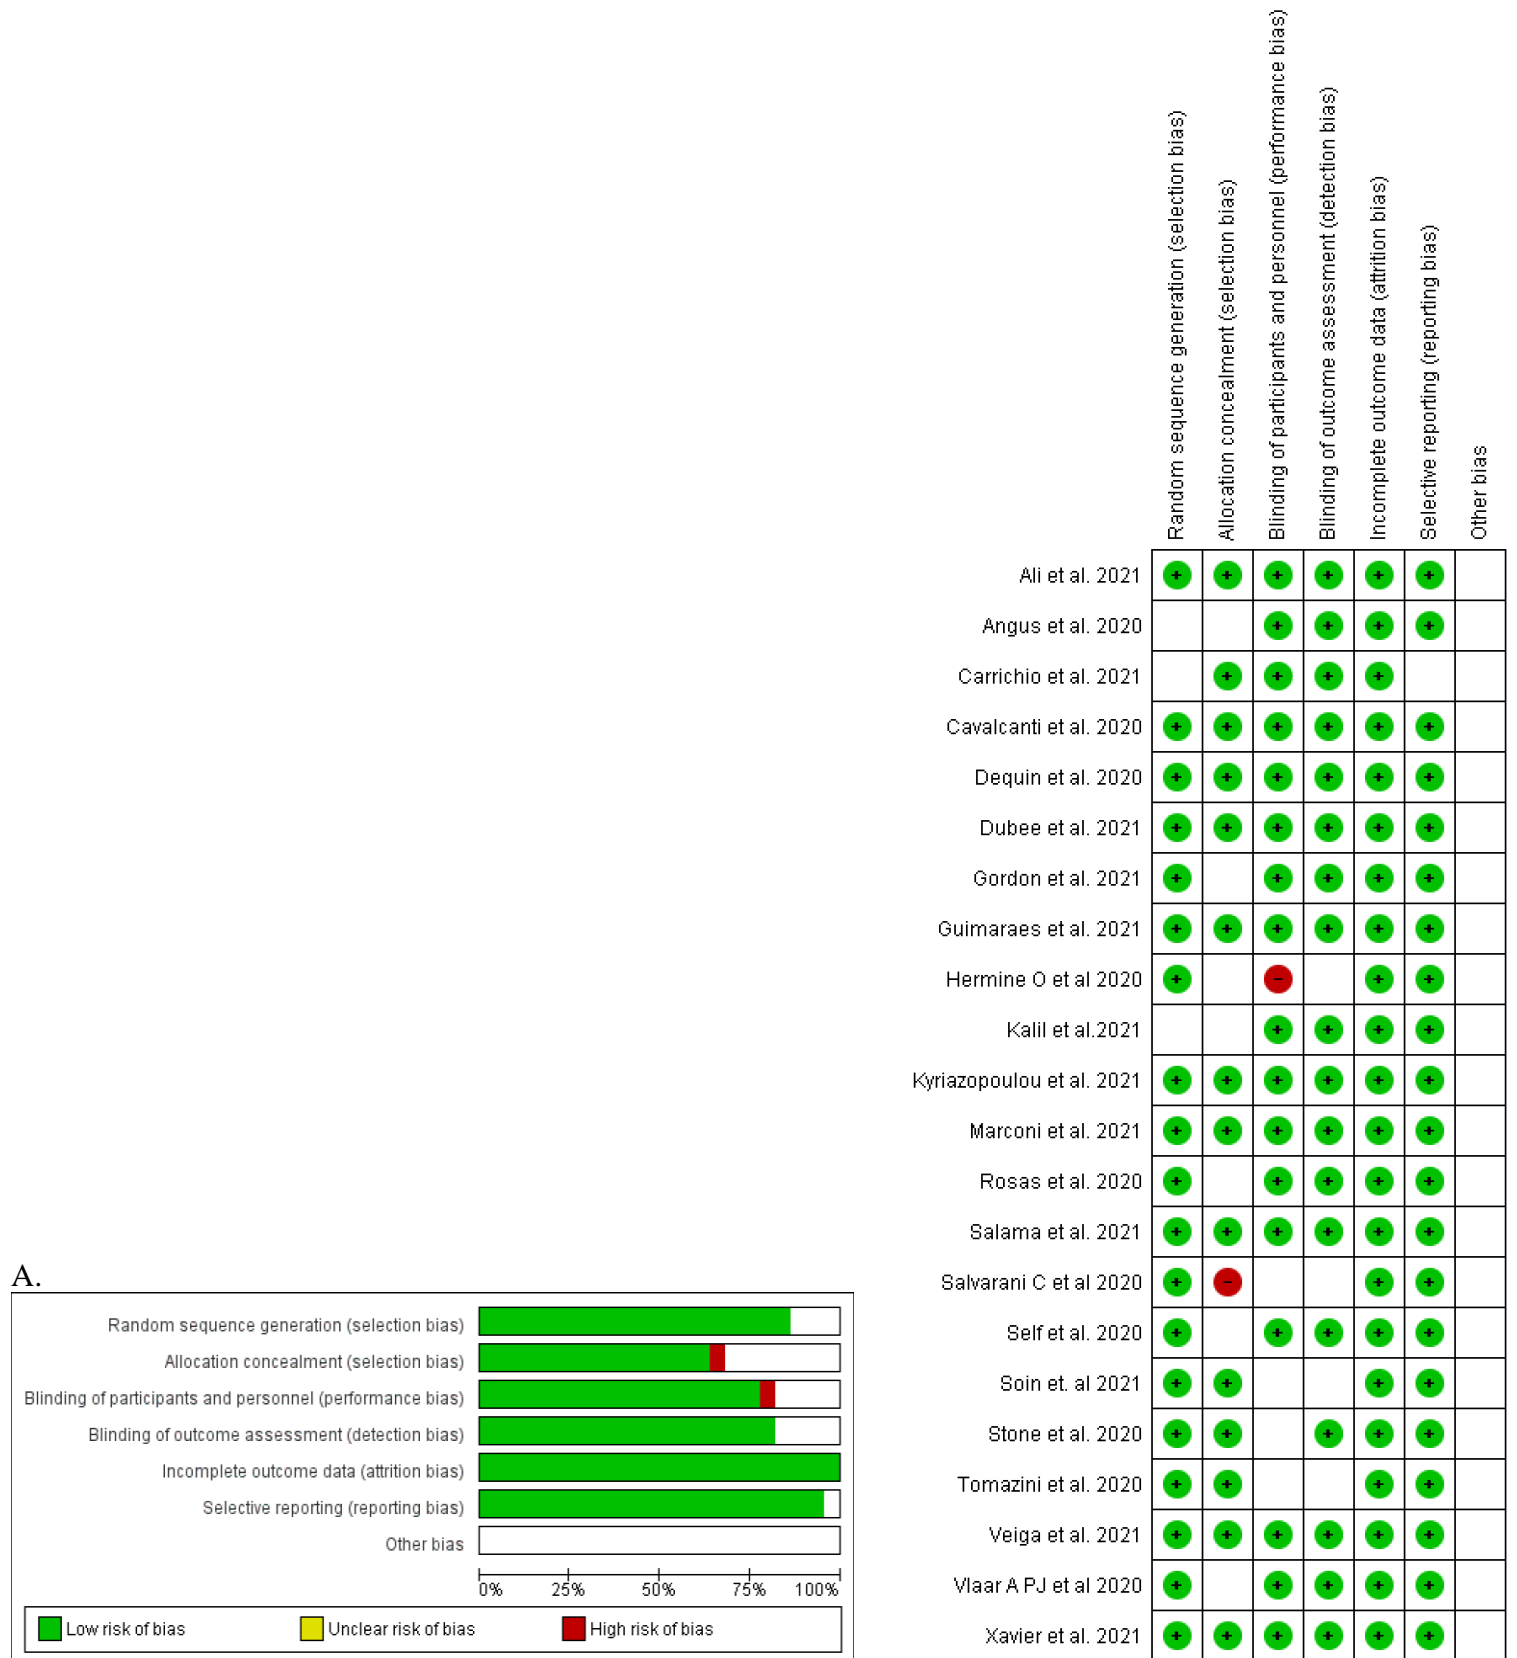

**Figure S2.A.**Risk of bias graph: review authors' judgements about each risk of bias item presented as percentages across all included studies; **B.**Risk of bias summary: review authors' judgements about each risk of bias item for each included study.

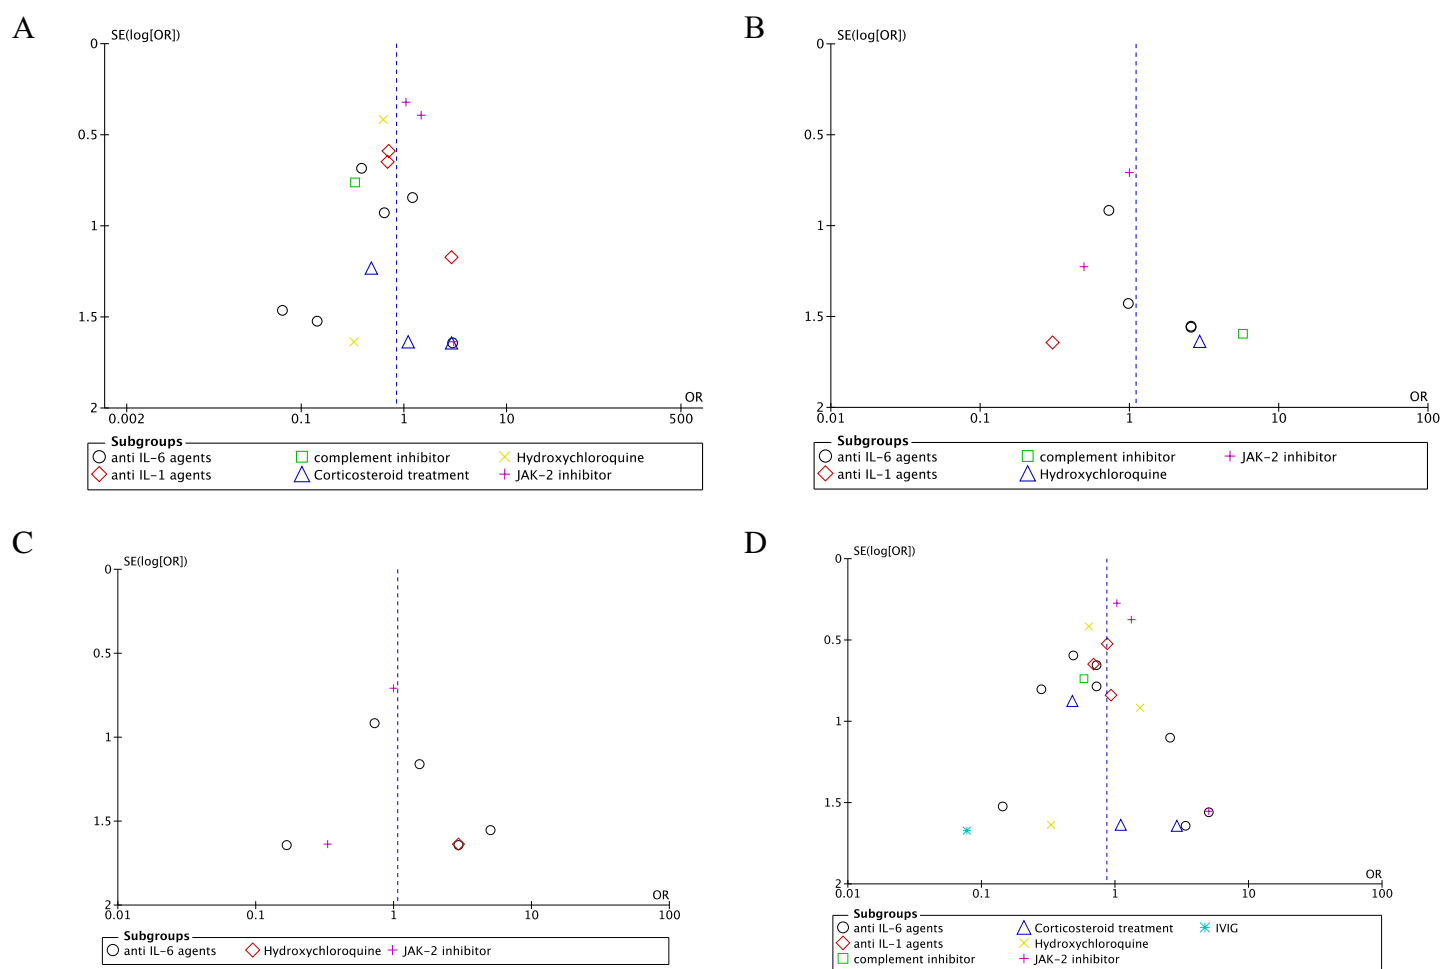

**Figure S3 .Diagnostic plots for each outcome based on the use of immunomodulatory agents or placebo.**Panel A: Venous thromboembolism, Panel B: Ischemic Stroke or systemic embolism, Panel C: myocardial infarction, Panel D: Any thromboembolic event

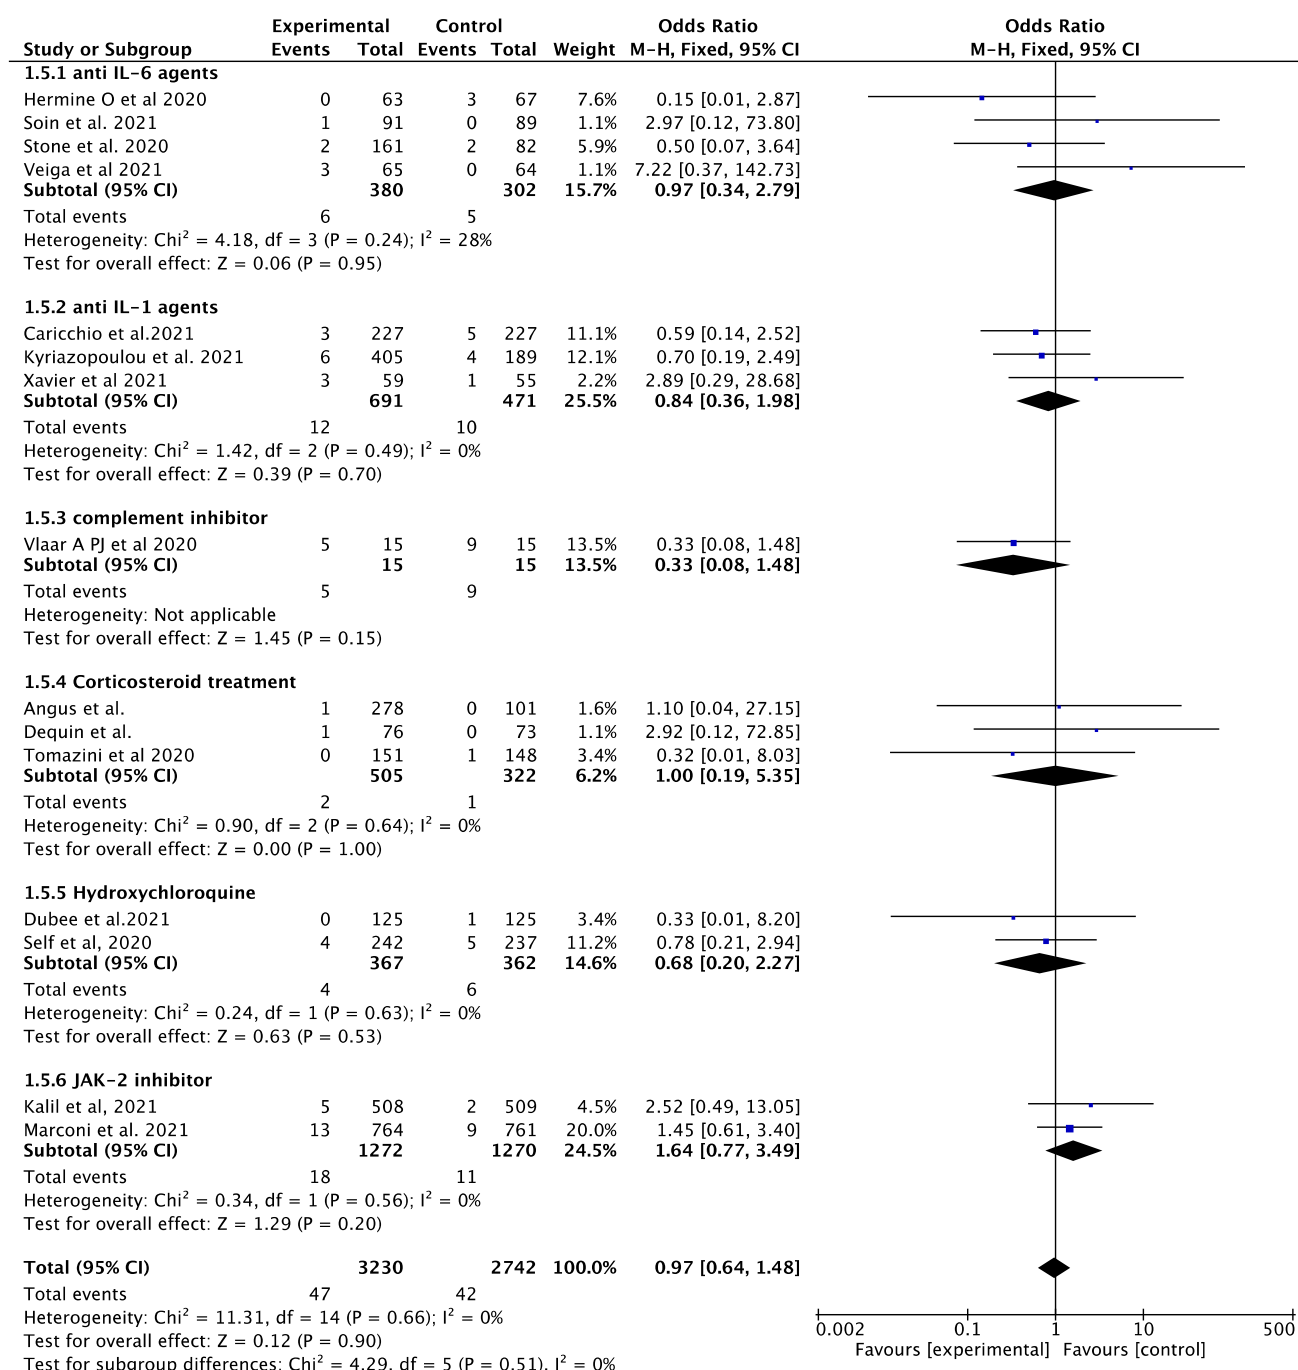

**Figure S4:** Odds ratio (OR) and 95% Confidence Intervals for the occurrence of pulmonary embolism among hospitalized COVID-19 patients assigned to immunomodulatory agents as an add-on to SOC vs. SOC only. Boxes represent the OR and lines represent the 95% CIs for individual studies. The diamonds and their width represent the pooled ORs and the 95% CIs, respectively. CI, confidence intervals for the Mantel-Hansen estimator,  $I^2$ : heterogeneity

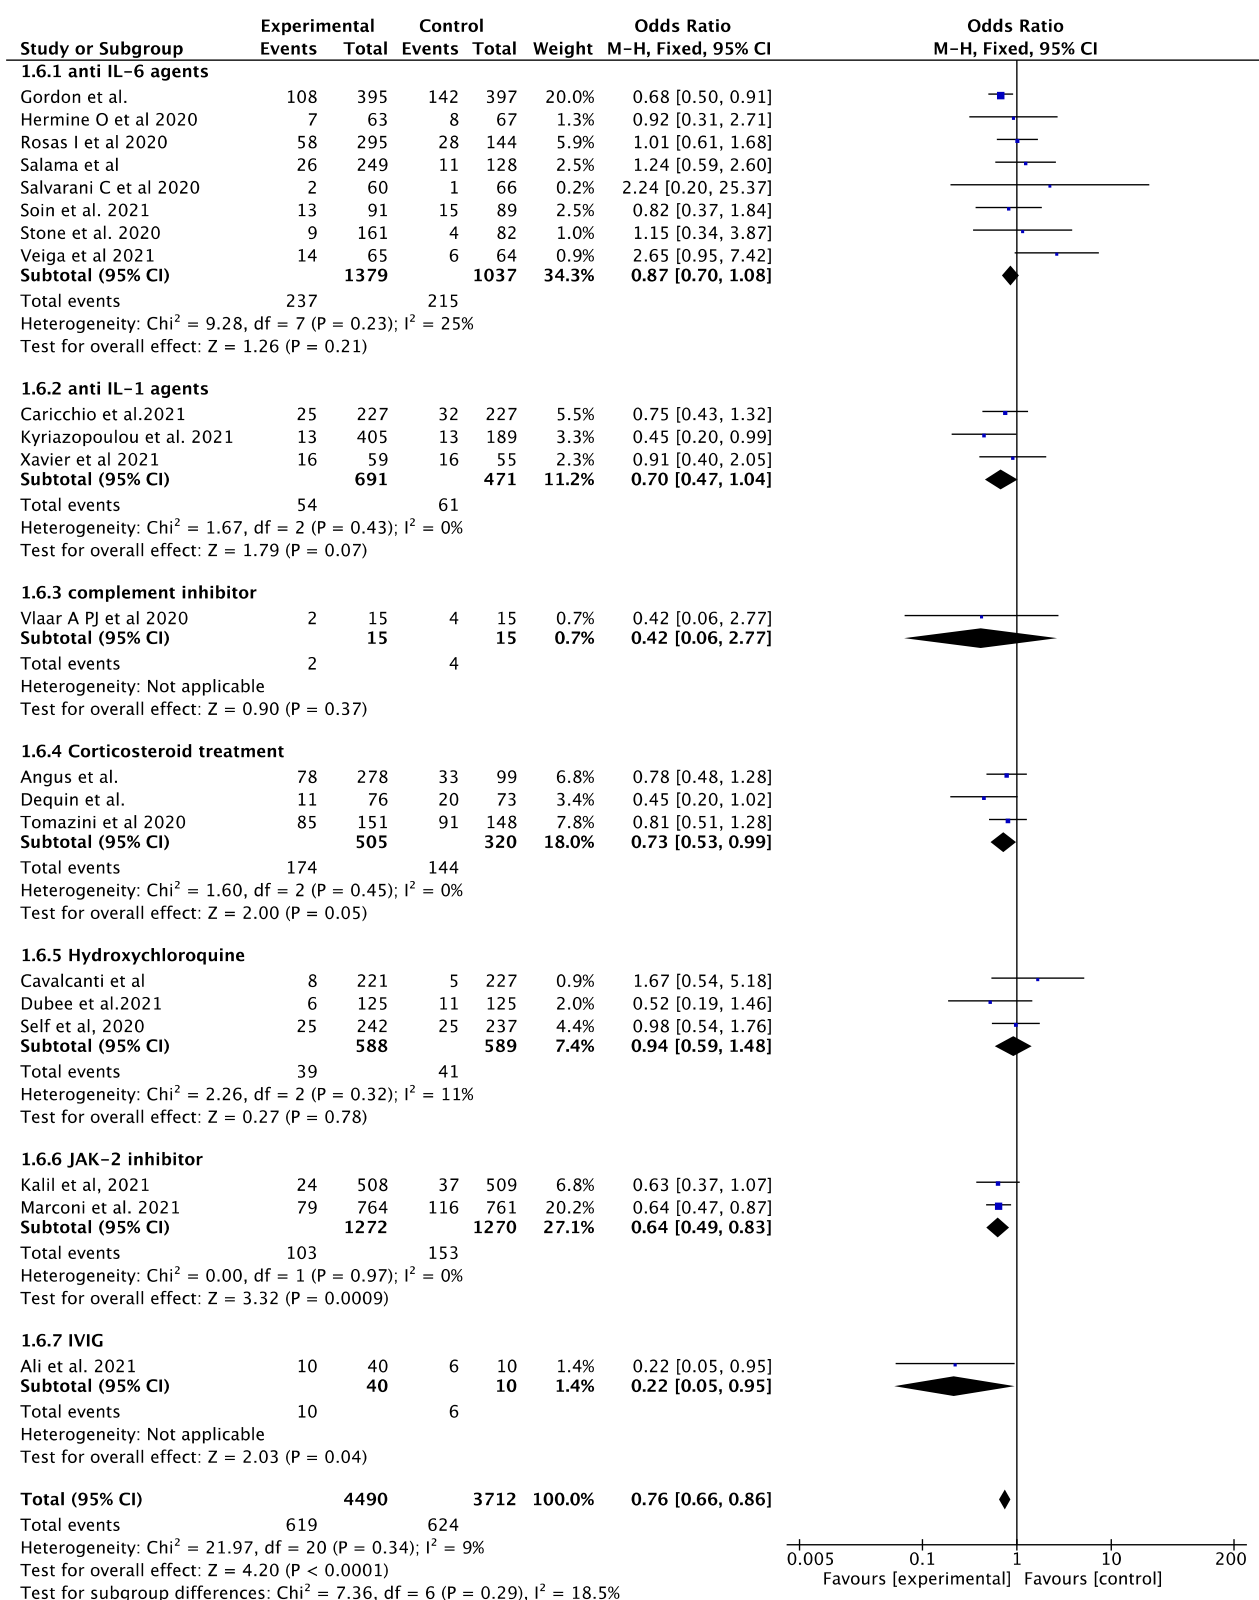

**Figure S5:** Odds ratio (OR) and 95% Confidence Intervals for mortality among hospitalized COVID-19 patients assigned to immunomodulatory agents as an add-on to SOC vs. SOC only. Boxes represent the OR and lines represent the 95% CIs for individual studies. The diamonds and their width represent the pooled ORs and the 95% CIs, respectively. CI, confidence intervals for the Mantel-Hansen estimator,  $I^2$ : heterogeneity
